# The nuclear envelope at a glance

Katherine L. Wilson\* and Jason M. Berk

Department of Cell Biology, The Johns Hopkins University School of Medicine, 725 N. Wolfe Street, Baltimore, MD 21205 USA

\*Author for correspondence (klwilson@jhmi.edu)

Journal of Cell Science 123, 1973-1978

© 2010. Published by The Company of Biologists Ltd  
doi:10.1242/jcs.019042

This article is part of a Minifocus on exploring the nucleus. For further reading, please see related articles: 'Integrating one-dimensional and three-dimensional maps of genomes' by Natalia Naumova and Job Dekker (*J. Cell Sci.* **123**, 1979-1988) and 'Connecting the transcription site to the nuclear pore: a multi-tether process regulating gene expression' by Guennaëlle Dieppois and Françoise Stutz (*J. Cell Sci.* **123**, 1989-1999).

The cell nucleus is the 'mothership' that organizes, protects and regulates the genome. The inner and outer nuclear membranes (INM and ONM, respectively) of the nuclear envelope (NE) have over 60 distinct membrane proteins, whose roles and functional sophistication might rival the cell surface. An appreciation of this functional complexity will be crucial to understand cell biology and to develop treatments for the growing range of human disorders caused by defects in lamins and other components of the NE.

Imagine what would be known about cells today if scientists were aware of only six proteins that localized at the plasma membrane, three of which (by chance) happen to be integrins – we would be unaware of the amazing repertoire of surface proteins that allow cells to network, signal, phagocytose, absorb nutrients,

sense and respond to hormones, generate and exploit ion gradients, and so on. Today, such ignorance is almost inconceivable. Yet, until recently, our knowledge of the inner and outer membrane domains of the NE – with its embedded nuclear pore complexes (NPCs) and underlying networks of nuclear intermediate filaments formed by A- and B-type lamins – was precisely this limited.

Early pioneers in nuclear biology discovered major structural proteins, named lamins (Aaronson and Blobel, 1975; Gerace et al., 1978), and a handful of lamin-binding nuclear membrane proteins including the lamin B receptor (LBR) (Worman et al., 1988), MAN1 (Paulin-Levasseur et al., 1996; Lin et al., 2000), lamina-associated polypeptide 1 (LAP1) and LAP2 (Foisner and Gerace, 1993) in vertebrates, and in *Drosophila* two proteins named Otefin (Padan et al., 1990) and Young Arrest (Lopez and Wolfner, 1997). The pace of discovery quickened in 1996 with the realization that a protein named emerin, deficiency in which causes X-linked recessive Emery-Dreifuss muscular dystrophy (Bione et al., 1994), localized at the INM (Manilal et al., 1996; Nagano et al., 1996). The compositional complexity of the NE was subsequently revealed by a proteomic analysis of rat liver nuclei in which 67 new nuclear envelope transmembrane (NET) proteins were identified (Schirmer et al., 2003; Schirmer and Gerace, 2005). Some NE membrane proteins are conserved in metazoans, whereas others are limited to vertebrates or to specific vertebrate tissues, suggesting they have highly specialized roles (Wagner and Krohne, 2007; Gruenbaum et al., 2005).

The idea that NE proteins influence human physiology is inescapably and increasingly supported by disease-gene-mapping studies. Over 20 syndromes in which one or more tissues (e.g. muscle, bone, fat, connective tissue, skin, heart, blood or nervous) are perturbed, brain development is disrupted or accelerated 'aging' occurs, have all been linked to mutations in human genes that encode A- or B-type lamins (*LMNA* or *LMNB1*, *LMNB2*, respectively) or NE membrane proteins that bind lamins, including emerin, LAP2, MAN1, LBR, nesprin-1 (*SYNE1*) or nesprin-2 (*SYNE2*) (Worman and Bonne, 2007; Scaffidi and Misteli, 2008; Wilson and Foisner, 2010). The spectrum of these diseases, collectively known as laminopathies, continues to expand. For example, dystonia, a neurological disease, is caused by mutations in torsin A, a protein in the luminal space of the NE and endoplasmic reticulum (ER) that monitors oxidative stress and that binds to the related luminal domains of the INM protein LAP1 and the ER membrane

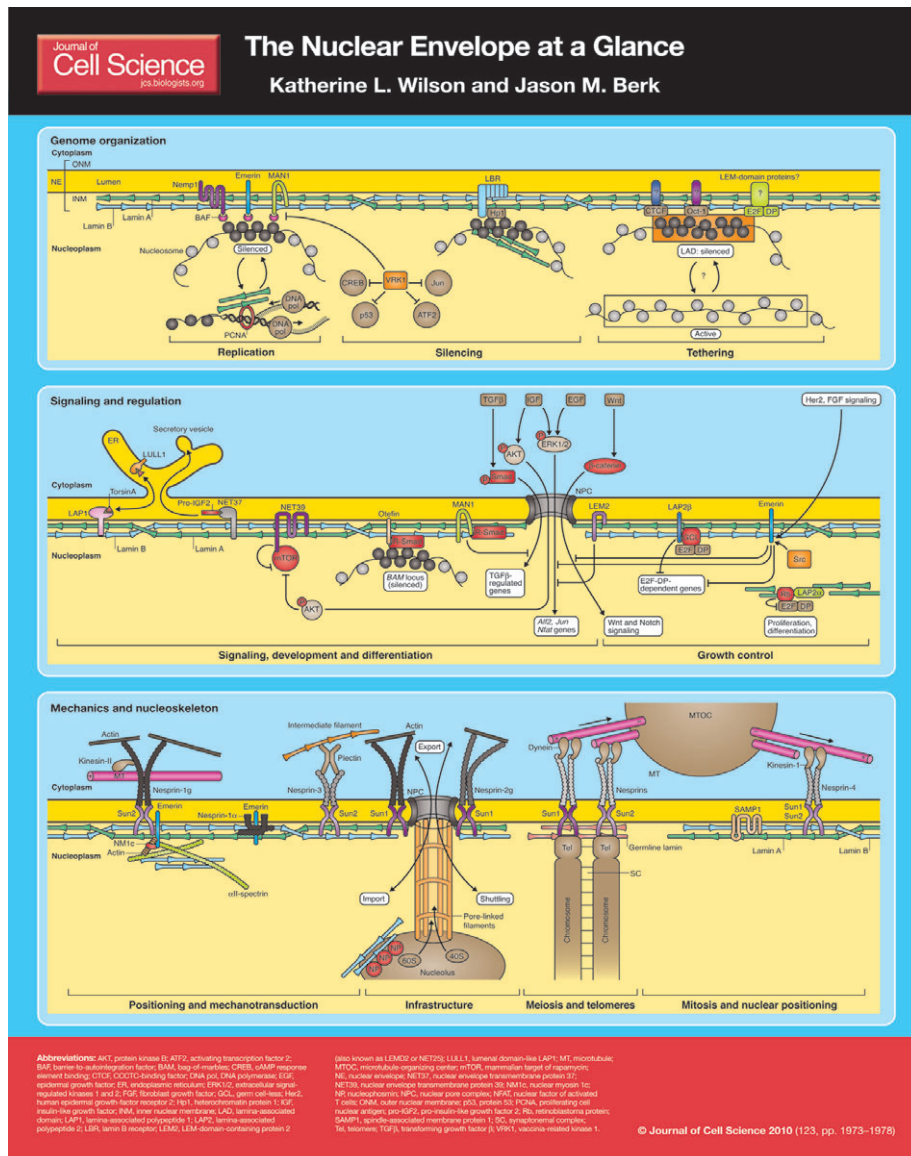

(See poster insert)

protein LULL1 (Goodchild and Dauer, 2004; Naismith et al., 2009). Each laminopathy inspires new ways to think about how human development and physiology are influenced by specific NE proteins. This article and the accompanying poster illustrate a variety of NE proteins and their roles in genome organization, cell signaling, gene regulation and the nucleus. Please also see supplementary material Fig. S1 for a 'long view' of the poster and Figs S2-4 for individual poster panels.

### Lamin filament networks

A- and B-type lamins form separate, functionally distinct networks of intermediate filaments that concentrate near the NE (the peripheral lamina network); stable lamin structures also exist within the nucleus (the internal lamina) (Bridger et al., 2007; Gruenbaum et al., 2003; Dechat et al., 2008). Almost all characterized INM proteins bind to A- or B-type lamins (or both) directly and are thereby retained at the NE; this is a major mechanism by which lamins contribute to nuclear structure and the functional specialization of the NE. Lamin filaments support two crucial nuclear activities through mechanisms that remain poorly understood: DNA replication [proliferating cell nuclear antigen (PCNA), a processivity factor for DNA polymerase, binds to lamin B (Shumaker et al., 2008)], and transcription (Spann et al., 2002; Shimi et al., 2008). The nucleolus, which lacks lamins, is externally scaffolded by lamin B1, which binds to nucleophosmin and is required for dynamic changes in nucleolar structure (Martin et al., 2009). A-type lamins determine the shape and mechanical stiffness of the nucleus (Dahl et al., 2008) and also influence signaling and gene regulation, for example, by providing binding sites for regulatory proteins, including PKC, Fos and MOK2 (Zastrow et al., 2004; Gonzalez et al., 2008; Gruenbaum et al., 2005; Marmiroli et al., 2009; Harper et al., 2009). A-type lamins contribute to the control of cell proliferation by interacting with LAP2 $\alpha$ , retinoblastoma protein (Rb) and inhibitor of growth protein 1 (ING1) (Johnson et al., 2004; Dorner et al., 2007; Han et al., 2008; Naetar and Foisner, 2009). Interestingly, lamin B1, by virtue of its abundance, appears to 'buffer' the cellular response to oxidative stress by binding to and sequestering the transcription factor Oct-1 (Malhas et al., 2009). One consequence of insufficient lamin B1 is that unsequestered (excess of) Oct-1 overactivates mir-31, a small RNA that downregulates the expression of several targets, including the *CDKN2A* locus; this locus encodes both *CDKN2B* (also known as p16-INK4a), which maintains the Rb checkpoint, and *CDKN2A* (also known as

p14ARF), which activates the p53 pathway (Malhas et al., 2010). Thus A- and B-type lamins also serve non-structural roles in the nucleus.

### Genome organization and signaling: major interlinked functions of the NE?

The LAP2, emerin, MAN1 (LEM)-domain family of nuclear proteins appears to have major roles in tethering chromatin, especially silenced chromatin, at the NE (Wagner and Krohne, 2007). All characterized LEM-domain proteins can bind directly to lamins and barrier-to-autointegration factor (BAF), a conserved mobile lamin- and chromatin-binding protein (Margalit et al., 2007a; Montes de Oca et al., 2009). After mitosis, these mutual binding partners (LEM-domain proteins, lamins, BAF) coordinate the reassembly of the NE and lamin networks around chromatin (Margalit et al., 2007a). BAF function is regulated by the conserved kinase VRK1, which causes BAF to release both DNA and LEM-domain proteins (Nichols et al., 2006). This release is important for mitosis (Gorjánác et al., 2007) and essential to reorganize chromosomes during meiosis (Lancaster et al., 2007).

During interphase, other proteins that are directly phosphorylated and inhibited by VRK1 include the transcription factors p53, Jun, activating transcription factor 2 (ATF2) and cAMP response element binding (CREB) protein (Klerkx et al., 2009). VRK1 promotes the G1-S-phase transition by upregulating the expression of cyclin D1 (Kang et al., 2008). BAF is required to express certain cyclins and for cell-cycle progression in *Drosophila melanogaster* (Furukawa et al., 2003), and facilitates S-phase progression in mammalian cells (Haraguchi et al., 2007). BAF also functions as a tissue-specific transcriptional repressor in *Caenorhabditis elegans* (Margalit et al., 2007b) and during vertebrate eye development (Wang et al., 2002) together with nuclear envelope integral membrane protein 1 (Nemp1), an INM protein (Mamada et al., 2009). BAF can bind histones and associate with specific chromatin regulators (Montes de Oca et al., 2009) but its mechanisms of repression remain unclear.

### Signaling cascades can be regulated by INM proteins

Transforming growth factor  $\beta$  (TGF $\beta$ ) signaling during embryogenesis and vertebrate development is regulated by MAN1, a LEM-domain protein that binds to receptor-regulated Smads (R-Smads) (Pan et al., 2005; Cohen et al., 2007). The *Drosophila* LEM-domain protein Otefin regulates TGF $\beta$  signaling and maintains germ-cell fate by binding an R-Smad, and by

physically tethering the repressed bag-of-marbles (*bam*) locus at the NE (Jiang et al., 2008). Another LEM-domain protein, emerin, binds directly to  $\beta$ -catenin and inhibits its nuclear accumulation, thereby attenuating Wnt signaling (Markiewicz et al., 2006; Tilgner et al., 2009). Emerin also binds to and feedback-inhibits Lmo7, a signaling transcription factor important in muscle (Holaska et al., 2006). Through unknown mechanisms, the nuclear accumulation of phosphorylated Erk1/2 (also known as mitogen-activated protein kinases 3 and 1, or MAPK3 and MAPK1, respectively) is significantly increased in emerin-null hearts (Muchir et al., 2007) and in emerin-downregulated cells (Muchir et al., 2009), suggesting that emerin also attenuates MAPK signaling. In developing myoblasts, Erk1/2 signaling is inhibited by LEM2 (also known as NET25) (Huber et al., 2009).

Roles in signaling are not exclusive to LEM-domain proteins. Direct binding of mTOR to the recently described INM protein NET39 inhibits the AKT signaling pathway, and insulin-like growth factor 2 (IGF2) production and autocrine signaling (Liu et al., 2009). Intriguingly, the luminal domain of another INM protein, NET37, has glycosidase activity implicated in the maturation of IGF2; NET37-deficient myoblasts show reduced IGF2 secretion and reduced AKT signaling, suggesting that myogenic differentiation involves inside-out signaling from the nucleoplasm to the NE lumen (Datta et al., 2009). Interestingly, the precursor of heparin-binding epidermal growth factor (HB-EGF), which traffics to the cell surface, can also traffic to the INM (Hieda et al., 2008), but whether this contributes to NE-localized signaling is unknown.

In addition to influencing several signaling cascades, new evidence suggests that emerin and other INM proteins are themselves regulated by signaling. Pathways and kinases that phosphorylate emerin include the human epidermal growth-factor receptor (EGFR)-family member Her2 (also known as Neu) (Bose et al., 2006), fibroblast growth-factor receptor 2IIIb (Luo et al., 2009), protein kinase A (Roberts et al., 2006) and non-receptor tyrosine kinases Src and Abl, which directly phosphorylate emerin and LAP2 $\beta$  (Tift et al., 2009). These results implicate INM proteins as downstream effectors (and potential regulators) of mitogenic signaling. Differential phosphorylation of emerin might control its binding to chromatin regulators [e.g. BAF,  $\beta$ -catenin, Lmo7, germ cell-less (GCL), Bcl2-associated transcription factor (Btf)] versus structural partners (nesprin-1 $\alpha$ , nesprin-2 $\beta$ , Sun1, Sun2, lamins, actin, nuclear myosin 1c), its ability to form specific multiprotein complexes at the

INM (Holaska and Wilson, 2007) or its ability to link mechanical inputs to changes in gene expression, a phenomenon known as mechanotransduction (Lammerding et al., 2005; Holaska, 2008).

### Chromatin silencing, tethering and release

In mammals, the ubiquitous transcription factor GCL binds directly to three LEM-domain proteins: LAP2 $\beta$  (Nili et al., 2001), emerin (Holaska et al., 2003) and MAN1 (Mansharamani and Wilson, 2005). In *Drosophila*, GCL is required to silence transcription in the germline (Leatherman et al., 2002). GCL and its interactions with LEM-domain proteins are interesting for several reasons. First, GCL binds the DP subunit of E2F-DP heterodimers and represses the transcription of E2F-DP-dependent genes (de la Luna et al., 1999); the tumor suppressor Rb represses such genes by binding the E2F subunit. Second, GCL appears to require LEM-domain proteins as co-repressors in vivo [as shown for LAP2 $\beta$  and emerin (Nili et al., 2001; Holaska and Wilson, 2006)], and E2F-DP-dependent gene regulation is disrupted in emerin-deficient muscle (Melcon et al., 2006). Third, E2F-DP-binding sites on chromatin were identified as border elements for large (~550 kbp) regions of human chromosomes known as lamina-associated domains (LADs) that contact lamin B1 and emerin (Guelen et al., 2008). Other LAD-border elements included binding sites for CTCF (a chromatin insulator), CpG islands (sites of DNA methylation) and outward-facing promoters (Guelen et al., 2008). There is substantial (80%) overlap between LADs and independently identified large organized chromatin regions (LOCKs) that, when repressed, are enriched in the silencing mark H3K9Me2 (dimethylated histone H3, lysine 9) (Wen et al., 2009). Thus, transcriptional repression in differentiated mammalian cells involves the tethering of specific regions of silenced chromatin to lamins and the NE, consistent with evidence that chromatin located near the NE is typically silenced (Akhtar and Gasser, 2007). Interestingly, developmentally regulated promoters (not the coding or 3'-untranslated regions) have active, positive roles in releasing silent chromatin from the NE to the interior (Meister et al., 2010). In primary human fibroblasts certain chromosomes are relocated either toward or away from the NE within 15 minutes after serum removal; this movement requires nuclear myosin 1c (Mehta et al., 2010).

Conversely, however, some NE-localized genes are expressed (Finlan et al., 2008), revealing large gaps in our understanding of the mechanisms and consequences of chromatin

attachment to the NE. For example, LBR binds to B-type lamins and appears to both tether and compact silenced chromatin, in part by binding to heterochromatin protein 1 (Hp1) (Ye et al., 1997; Li et al., 2003) and potentially also to methyl-CpG-binding protein 2 (MeCP2) (Guarda et al., 2009). However, the membrane domain of LBR has sterol reductase activity that is important for cholesterol metabolism during human blood and bone development (Hoffmann et al., 2007). Another INM protein, nurim, is extraordinarily resistant to biochemical extraction, and is homologous both to isoprenylcysteine carboxymethyltransferases (which process CaaX motifs found in lamins and Ras) and to a *Mycobacterium tuberculosis* protein of unknown function (Hofemeister and O'Hare, 2005). These findings illustrate an emerging theme: NE membrane proteins can have unexpected roles in cells, tissues and disease.

During late S phase, heterochromatin detaches from the NE, moves to the nuclear interior for DNA replication and then returns to the NE (Li et al., 1998). One can speculate that this remarkable chain of events involves molecular motors and is regulated by signals that permit the release and subsequent re-attachment of transcriptionally silent (LOCK'd), tethered (LAD'd) chromatin at the NE.

### Mechanical and nucleoskeletal roles of NE proteins

Specific proteins embedded in the INM and ONM interact to form structures that span the NE and mechanically link lamin filaments to the cytoskeleton (Lee et al., 2002; Crisp et al., 2006; Starr, 2009). The discovery of these structures, termed linker of nucleoskeleton and cytoskeleton (LINC) complexes (Crisp et al., 2006) was a convergence of studies done in yeast (*S. pombe*), worms (*C. elegans*), flies (*Drosophila*) and cultured mammalian cells, illustrating the value of curiosity-driven research in diverse organisms. KASH-domain proteins (e.g. giant isoforms of nesprin-1 and nesprin-2) embedded in the ONM can bind directly and simultaneously to a cytoskeletal component (e.g. actin filaments, plectin or microtubule-dependent motors) and to the NE-luminal domain of SUN-domain proteins embedded in the INM (Burke and Roux, 2009). SUN-domain proteins, in turn, bind directly to lamins, forming a basic mechanical unit that spans the NE (Tzur et al., 2006). Sun1 and Sun2 have both overlapping and distinct roles (Lei et al., 2009; Olins et al., 2009). For example, Sun1 concentrates near NPCs and is required to space NPCs; in addition, Sun1 preferentially binds to the precursor form of lamin A, implying roles in lamin A maturation or assembly (Liu

et al., 2007; Haque et al., 2010). By contrast, Sun2 is not NPC-associated and binds equally well to both precursor and mature lamin A, consistent with stable anchoring to lamin filaments (Liu et al., 2007). Sun1 and Sun2 also bind directly to emerin, implicating this INM protein as a core LINC complex component (Haque et al., 2010); indeed, in skin fibroblasts, emerin is required to localize the nesprin-2 giant (nesprin-2g) at the ONM (Randles et al., 2010). Interestingly, torsinA – the above-mentioned NE- and ER-lumen protein – is an ATPase that can detach LINC complexes formed by Sun2, nesprin-2 and nesprin-3, but does not affect Sun1 or NPCs (Vander Heyden et al., 2009). This suggests that LINC complexes are actively and selectively remodeled.

Mammals have four known nesprin genes. The genes for nesprin-1 and nesprin-2 (*Syne1* and *Syne2*, respectively) each express numerous protein isoforms, the largest of which are ~1 MDa (known as giant isoforms) (Warren et al., 2005). Most nesprins have multiple spectrin-repeat domains, suggesting that they contribute both stiffness and extensibility to nuclear structure (Dahl et al., 2008). The giant nesprin-1 and nesprin-2 isoforms localize to the ONM, whereas others are found specifically at the INM, or in the nuclear interior, cytoplasm (e.g. in muscle sarcomeres), Golgi membranes or elsewhere (Warren et al., 2005). As nesprin-1 $\alpha$  and nesprin-3 $\alpha$  were shown to form homodimers (Mislow et al., 2002; Ketema et al., 2007), the poster speculatively depicts all nesprins as homodimers. ONM-localized nesprin-1 and nesprin-2 giants bind directly to F-actin. Interestingly, the nesprin-1 giant can also associate with kinesin-II – a plus-end-directed microtubule motor – during mitosis, and this interaction might be important for cytokinesis (Fan and Beck, 2004). Little is known about how the attachment of LINC complexes to the nucleoskeleton or cytoskeleton is regulated. However, one interesting possibility comes from studies of the postsynaptic neuromuscular junction, where the receptor tyrosine kinase muscle-specific kinase (MuSK) – mutations in which are linked to myasthenia gravis (Stiegler et al., 2009) – associates with the nesprin-1 and nesprin-2 giants (Apel et al., 2000). Smaller INM-localized isoforms, including nesprin-1 $\alpha$  and nesprin-2 $\beta$ , predominate in muscle (Randles et al., 2010); they do not bind to actin, but instead bind to lamins and the INM protein emerin (Mislow et al., 2002; Zhang et al., 2005).

### Roles for NE proteins in moving enormous cargo

Nesprin-3 $\alpha$  (~116 kDa) is an ONM protein that binds to plectin (or to dystonin in neurons) and

thereby links the NE to cytoplasmic intermediate filaments (Wilhelmsen et al., 2005; Young and Kothary, 2008). In keratinocytes, plectin provides a one-step bridge between nesprin-3 $\alpha$  at the ONM and integrin  $\alpha 6 \beta 4$  at the cell surface (Wilhelmsen et al., 2005). The  $\beta$ -isoform of nesprin-3 lacks the plectin/dystonin-binding domain. Nesprin-4 is expressed mainly in secretory epithelia, localizes to the ONM and binds the plus-end-directed microtubule motor kinesin-1; together, nesprin-4 and kinesin-1 are proposed to push the nucleus away from the microtubule organizing center (MTOC) and Golgi complex to achieve a basal position within a polarized cell (Roux et al., 2009). In *C. elegans*, the ONM-localized KASH protein Unc-83 specifically binds to the light chain (KLC-2) of kinesin-1 (Meyerzon et al., 2009), whereas a different KASH protein, ZYG-12, is involved in at least two activities: dynein-mediated nuclear movement during embryogenesis and chromocenter-tethered chromosome movement during meiosis (Penkner et al., 2009; Sato et al., 2009).

Nuclei are actively repositioned in cells by microtubule-dependent motors during development and differentiation [e.g. in neurons (Gros-Louis et al., 2007; Starr, 2009)], and are also repositioned relative to the MTOC each time a motile cell changes direction (Gomes et al., 2005). The highly conserved INM protein SAMP1 is required to anchor the MTOC near the nucleus; SAMP1 also defines a novel membrane that colocalizes with the mitotic spindle (Buch et al., 2009). How SAMP1 is coupled to the MTOC during interphase and the nature of its mitotic role are intriguing questions. During meiosis, the telomeres of paired chromosomes are anchored to the NE by Sun proteins and germ-cell-specific lamins, then dragged long distances along the NE by microtubule-dependent motors in the cytoplasm. These coordinated movements are crucial for chromosome pairing and recombination in *C. elegans* (Penkner et al., 2007), require Sun1 and Sun2 in mammals (Ding et al., 2007; Schmitt et al., 2007) and are conserved in *S. pombe* (Chikashige et al., 2007). Thus, nuclear membrane proteins have ancient roles in nuclear movement and sexual recombination.

## Perspectives

Many challenging questions about the nucleus beckon. What are the mechanisms of chromosome- and gene-tethering to the NE? How are these tethers regulated? How do potentially hundreds of different NE membrane proteins influence the genome, cellular signaling pathways and molecular biology? What roles are played by the NE-anchored

nucleoskeleton that, in addition to lamins, includes myosins (Louvet and Percipalle, 2009), actin (Gieni and Hendzel, 2009), spectrin (Young and Kothary, 2005), protein 4.1 (Krauss et al., 2003; Kiseleva et al., 2004) and titin (Machado et al., 1998; Zastrow et al., 2006)? With further exploration of the structure and function of NE components, it is certain that more surprises, new insights into cell biology and human physiology, and new targets for molecular medicine await us.

We gratefully acknowledge National Institutes of Health funding (RO1GM48646 to KLW). Deposited in PMC for release after 12 months.

Supplementary material available online at <http://jcs.biologists.org/cgi/content/full/123/12/1973/DC1>

## References

- Aaronson, R. P. and Blobel, G. (1975). Isolation of nuclear pore complexes in association with a lamina. *Proc. Natl. Acad. Sci. USA* **72**, 1007-1011.
- Akhtar, A. and Gasser, S. M. (2007). The nuclear envelope and transcriptional control. *Nat. Rev. Genet.* **8**, 507-517.
- Apel, E. D., Lewis, R. M., Grady, R. M. and Sanesi, J. R. (2000). Syne-1, a dystrophin- and Klarsicht-related protein associated with synaptic nuclei at the neuromuscular junction. *J. Biol. Chem.* **275**, 31986-31995.
- Bione, S., Maestrini, E., Rivella, S., Mancini, M., Regis, S., Romeo, G. and Toniolo, D. (1994). Identification of a novel X-linked gene responsible for Emery-Dreifuss muscular dystrophy. *Nat. Genet.* **8**, 323-327.
- Bose, R., Molina, H., Patterson, A. S., Bitok, J. K., Periaswamy, B., Bader, J. S., Pandey, A. and Cole, P. A. (2006). Phosphoproteomic analysis of Her2/neu signaling and inhibition. *Proc. Natl. Acad. Sci. USA* **103**, 9773-9778.
- Bridger, J. M., Foeger, N., Kill, I. R. and Herrmann, H. (2007). The nuclear lamina. Both a structural framework and a platform for genome organization. *FEBS J.* **274**, 1354-1361.
- Buch, C., Lindberg, R., Figueroa, R., Gudise, S., Onischenko, E. and Hallberg, E. (2009). An integral protein of the inner nuclear membrane localizes to the mitotic spindle in mammalian cells. *J. Cell Sci.* **122**, 2100-2107.
- Burke, B. and Roux, K. J. (2009). Nuclei take a position: managing nuclear location. *Dev. Cell* **17**, 587-597.
- Chikashige, Y., Haraguchi, T. and Hiraoka, Y. (2007). Another way to move chromosomes. *Chromosoma* **116**, 497-505.
- Cohen, T. V., Kostic, O. and Stewart, C. L. (2007). The nuclear envelope protein MAN1 regulates TGF $\beta$  signaling and vasculogenesis in the embryonic yolk sac. *Development* **134**, 1385-1395.
- Crisp, M., Liu, Q., Roux, K., Rattner, J. B., Shanahan, C., Burke, B., Stahl, P. D. and Hodzic, D. (2006). Coupling of the nucleus and cytoplasm: role of the LINC complex. *J. Cell Biol.* **172**, 41-53.
- Dahl, K. N., Ribeiro, A. J. and Lammerding, J. (2008). Nuclear shape, mechanics, and mechanotransduction. *Circ. Res.* **102**, 1307-1318.
- Datta, K., Guan, T. and Gerace, L. (2009). NET37, a nuclear envelope transmembrane protein with glycosidase homology, is involved in myoblast differentiation. *J. Biol. Chem.* **284**, 29666-29676.
- de la Luna, S., Allen, K. E., Mason, S. L. and La Thangue, N. B. (1999). Integration of a growth-suppressing BTB/POZ domain protein with the DP component of the E2F transcription factor. *EMBO J.* **18**, 212-228.
- Dechat, T., Pflieger, K., Sengupta, K., Shimi, T., Shumaker, D. K., Solimando, L. and Goldman, R. D. (2008). Nuclear lamins: major factors in the structural organization and function of the nucleus and chromatin. *Genes Dev.* **22**, 832-853.
- Ding, X., Xu, R., Yu, J., Xu, T., Zhuang, Y. and Han, M. (2007). SUN1 is required for telomere attachment to nuclear envelope and gametogenesis in mice. *Dev. Cell* **12**, 863-872.
- Dorner, D., Gotzmann, J. and Foisner, R. (2007). Nucleoplasmic lamins and their interaction partners, LAP2 $\alpha$ , Rb, and BAF, in transcriptional regulation. *FEBS J.* **274**, 1362-1373.
- Fan, J. and Beck, K. A. (2004). A role for the spectrin superfamily member Syne-1 and kinesin II in cytokinesis. *J. Cell Sci.* **117**, 619-629.
- Finlan, L. E., Sproul, D., Thomson, I., Boyle, S., Kerr, E., Perry, P., Ylstra, B., Chubb, J. R. and Bickmore, W. A. (2008). Recruitment to the nuclear periphery can alter expression of genes in human cells. *PLoS Genet.* **4**, e1000039.
- Foisner, R. and Gerace, L. (1993). Integral membrane proteins of the nuclear envelope interact with lamins and chromosomes, and binding is modulated by mitotic phosphorylation. *Cell* **73**, 1267-1279.
- Furukawa, K., Sugiyama, S., Osouda, S., Goto, H., Inagaki, M., Horigome, T., Omata, S., McConnell, M., Fisher, P. A. and Nishida, Y. (2003). Barrier-to-autointegration factor plays crucial roles in cell cycle progression and nuclear organization in *Drosophila*. *J. Cell Sci.* **116**, 3811-3823.
- Gerace, L., Blum, A. and Blobel, G. (1978). Immunocytochemical localization of the major polypeptides of the nuclear pore complex-lamina fraction. Interphase and mitotic distribution. *J. Cell Biol.* **79**, 546-566.
- Gieni, R. S. and Hendzel, M. J. (2009). Actin dynamics and functions in the interphase nucleus: moving toward an understanding of nuclear polymeric actin. *Biochem. Cell Biol.* **87**, 283-306.
- Gomes, E. R., Jani, S. and Gundersen, G. G. (2005). Nuclear movement regulated by Cdc42, MRCK, myosin, and actin flow establishes MTOC polarization in migrating cells. *Cell* **121**, 451-463.
- Gonzalez, J. M., Navarro-Puche, A., Casar, B., Crespo, P. and Andres, V. (2008). Fast regulation of AP-1 activity through interaction of lamin A/C, ERK1/2, and c-Fos at the nuclear envelope. *J. Cell Biol.* **183**, 653-666.
- Goodchild, R. E. and Dauer, W. T. (2005). The AAA+ protein torsinA interacts with a conserved domain present in LAP1 and a novel ER protein. *J. Cell Biol.* **168**, 855-862.
- Gorjánac, M., Klerkx, E. P. F., Galy, V., Santarella, R., López-Iglesias, C., Askjaer, P. and Mattaj, J. W. (2007). *C. elegans* BAF-1 and its kinase VRK-1 participate directly in postmitotic nuclear envelope assembly. *EMBO J.* **26**, 132-143.
- Gros-Louis, F., Dupré, N., Dion, P., Fox, M. A., Laurent, S., Verreault, S., Sanes, J. R., Bouchard, J. P. and Rouleau, G. A. (2007). Mutations in SYNE1 lead to a newly discovered form of autosomal recessive cerebellar ataxia. *Nat. Genet.* **39**, 80-85.
- Gruenbaum, Y., Goldman, R. D., Meyuhar, R., Milles, E., Margalit, A., Fridkin, A., Dayani, Y., Prokocimer, M. and Enosh, A. (2003). The nuclear lamina and its functions in the nucleus. *Int. Rev. Cyt.* **226**, 1-62.
- Gruenbaum, Y., Margalit, A., Goldman, R. D., Shumaker, D. K. and Wilson, K. L. (2005). The nuclear lamina comes of age. *Nat. Rev. Mol. Cell Biol.* **6**, 21-31.
- Guarda, A., Bolognese, F., Bonapace, I. M. and Badaracco, G. (2009). Interaction between the inner nuclear membrane lamin B receptor and the heterochromatic methyl binding protein, MeCP2. *Exp. Cell Res.* **315**, 1895-1903.
- Guelen, L., Pagie, L., Brasset, E., Meuleman, W., Faza, M. B., Talhout, W., Eussen, B. H., de Klein, A., Wessels, L., de Laat, W. et al. (2008). Domain organization of human chromosomes revealed by mapping of nuclear lamina interactions. *Nature* **453**, 948-951.
- Han, X., Feng, X., Rattner, J. B., Smith, H., Bose, P., Suzuki, K., Soliman, M. A., Scott, M. S., Burke, B. E. and Riabowol, K. (2008). Tethering by lamin A stabilizes and targets the ING1 tumour suppressor. *Nat. Cell Biol.* **10**, 1333-1340.
- Haraguchi, T., Koujin, T., Osakada, H., Kojidani, T., Mori, C., Masuda, H. and Hiraoka, Y. (2007). Nuclear localization of barrier-to-autointegration factor is correlated with progression of S phase in human cells. *J. Cell Sci.* **120**, 1967-1977.
- Haque, F., Mazzeo, D., Patel, J. T., Smallwood, D. T., Ellis, J. A., Shanahan, C. M. and Shackleton, S. (2010). Mammalian SUN protein interaction networks at the inner

- nuclear membrane and their role in laminopathy disease processes. *J. Biol. Chem.* **285**, 3487-3498.
- Harper, M., Tillit, J., Kress, M. and Ernoul-Lange, M. (2009). Phosphorylation-dependent binding of human transcription factor MOK2 to lamin A/C. *FEBS J.* **276**, 3137-3147.
- Hieda, M., Isokane, M., Koizumi, M., Higashi, C., Tachibana, T., Shudou, M., Taguchi, T., Hieda, Y. and Higashiyama, S. (2008). Membrane-anchored growth factor, HB-EGF, on the cell surface targeted to the inner nuclear membrane. *J. Cell Biol.* **180**, 763-769.
- Hofemeister, H. and O'Hare, P. (2005). Analysis of the localization and topology of nurim, a polytopic protein tightly associated with the inner nuclear membrane. *J. Biol. Chem.* **280**, 2512-2521.
- Hoffmann, K., Sperling, K., Olins, A. L. and Olins, D. E. (2007). The granulocyte nucleus and lamin B receptor: avoiding the ovoid. *Chromosoma* **116**, 227-235.
- Holaska, J. M. (2008). Emerin and the nuclear lamina in muscle and cardiac disease. *Circ. Res.* **103**, 16-23.
- Holaska, J. M. and Wilson, K. L. (2006). Multiple roles for emerin: implications for Emery-Dreifuss muscular dystrophy. *Anat. Rec. A Discov. Mol. Cell. Evol. Biol.* **288**, 676-680.
- Holaska, J. M. and Wilson, K. L. (2007). An emerin "proteome": purification of distinct emerin-containing complexes from HeLa cells suggests molecular basis for diverse roles including gene regulation, mRNA splicing, signaling, mechanosensing, and nuclear architecture. *Biochemistry* **46**, 8897-8908.
- Holaska, J. M., Lee, K. K., Kowalski, A. K. and Wilson, K. L. (2003). Transcriptional repressor germ cell-less (GCL) and barrier-to-autointegration factor (BAF) compete for binding to emerin in vitro. *J. Biol. Chem.* **278**, 6969-6975.
- Holaska, J. M., Rais-Bahrami, S. and Wilson, K. L. (2006). Lmo7 is an emerin-binding protein that regulates the transcription of emerin and many other muscle-relevant genes. *Hum. Mol. Genet.* **15**, 3459-3472.
- Huber, M. D., Guan, T. and Gerace, L. (2009). Overlapping functions of nuclear envelope proteins NET25 (Lem2) and emerin in regulation of extracellular signal-regulated kinase signaling in myoblast differentiation. *Mol. Cell. Biol.* **29**, 5718-5728.
- Jiang, X., Xia, L., Chen, D., Yang, Y., Huang, H., Yang, L., Zhao, Q., Shen, L. and Wang, J. (2008). Otefin, a nuclear membrane protein, determines the fate of germline stem cells in *Drosophila* via interaction with Smad complexes. *Dev. Cell* **14**, 494-506.
- Johnson, B. R., Nitta, R. T., Frock, R. L., Mounkes, L., Barbic, D. A., Stewart, C. L., Harlow, E. and Kennedy, B. K. (2004). A-type lamins regulate retinoblastoma protein function by promoting subnuclear localization and preventing proteasomal degradation. *Proc. Natl. Acad. Sci. USA* **101**, 9677-9682.
- Kang, T. H., Park, D. Y., Kim, W. and Kim, K. T. (2008). VRK1 phosphorylates CREB and mediates CCND1 expression. *J. Cell Sci.* **121**, 3035-3041.
- Ketema, M., Wilhelmsen, K., Kuikman, I., Janssen, H., Hodzic, D. and Sonnenberg, A. (2007). Requirements for the localization of nesprin-3 at the nuclear envelope and its interaction with plectin. *J. Cell Sci.* **120**, 3384-3394.
- Kiseleva, E., Drummond, S. P., Goldberg, M. W., Rutherford, S. A., Allen, T. D. and Wilson, K. L. (2004). Actin- and protein-4.1-containing filaments link nuclear pore complexes to subnuclear organelles in *Xenopus* oocyte nuclei. *J. Cell Sci.* **117**, 2481-2490.
- Klerkx, E. P., Lazo, P. A. and Askjaer, P. (2009). Emerging biological functions of the vaccinia-related kinase (VRK) family. *Histol. Histopathol.* **24**, 749-759.
- Krauss, S. W., Chen, C., Penman, S. and Heald, R. (2003). Nuclear actin and protein 4.1: essential interactions during nuclear assembly in vitro. *Proc. Natl. Acad. Sci. USA* **100**, 10752-10757.
- Lammerding, J., Hsiao, J., Schulze, P. C., Kozlov, S., Stewart, C. L. and Lee, R. T. (2005). Abnormal nuclear shape and impaired mechanotransduction in emerin-deficient cells. *J. Cell Biol.* **170**, 781-791.
- Lancaster, O. M., Cullen, C. F. and Ohkura, H. (2007). NHK-1 phosphorylates BAF to allow karyosome formation in the *Drosophila* oocyte nucleus. *J. Cell Biol.* **179**, 817-824.
- Leatherman, J., Levin, L., Boero, J. and Jongens, T. (2002). Germ cell-less acts to repress transcription during the establishment of the *Drosophila* germ cell lineage. *Curr. Biol.* **12**, 1681.
- Lee, K. K., Starr, D., Liu, J., Cohen, M., Han, M., Wilson, K. and Gruenbaum, Y. (2002). Lamin-dependent localization of UNC-84, a protein required for nuclear migration in *C. elegans*. *Mol. Biol. Cell* **13**, 892-901.
- Lei, K., Zhang, X., Ding, X., Guo, X., Chen, M., Zhu, B., Xu, T., Zhuang, Y., Xu, R. and Han, M. (2009). SUN1 and SUN2 play critical but partially redundant roles in anchoring nuclei in skeletal muscle cells in mice. *Proc. Natl. Acad. Sci. USA* **106**, 10207-10212.
- Li, G., Sudlow, G. and Belmont, A. S. (1998). Interphase cell cycle dynamics of a late-replicating, heterochromatic homogeneously staining region: precise choreography of condensation/decondensation and nuclear positioning. *J. Cell Biol.* **140**, 975-989.
- Li, Y., Danzer, J. R., Alvarez, P., Belmont, A. S. and Wallrath, L. L. (2003). Effects of tethering HP1 to euchromatic regions of the *Drosophila* genome. *Development* **130**, 1817-1824.
- Lin, F., Blake, D. L., Callebaut, I., Skerjanc, I. S., Holmer, L., McBurney, M. W., Paulin-Levasseur, M. and Worman, H. J. (2000). MAN1, an inner nuclear membrane protein that shares the LEM domain with lamina-associated polypeptide 2 and emerin. *J. Biol. Chem.* **275**, 4840-4847.
- Liu, G. H., Guan, T., Datta, K., Coppinger, J., Yates, J., 3rd and Gerace, L. (2009). Regulation of myoblast differentiation by the nuclear envelope protein NET39. *Mol. Cell. Biol.* **29**, 5800-5812.
- Liu, Q., Pante, N., Misteli, T., Elsagga, M., Crisp, M., Hodzic, D., Burke, B. and Roux, K. J. (2007). Functional association of Sun1 with nuclear pore complexes. *J. Cell Biol.* **178**, 785-798.
- Lopez, J. M. and Wolfner, M. F. (1997). The developmentally regulated *Drosophila* embryonic nuclear lamina protein 'Young Arrest' (fs(1)Ya) is capable of associating with chromatin. *J. Cell Sci.* **110**, 643-651.
- Louvet, E. and Percipalle, P. (2009). Transcriptional control of gene expression by actin and myosin. *Int. Rev. Cell Mol. Biol.* **272**, 107-147.
- Luo, Y., Yang, C., Jin, C., Xie, R., Wang, F. and McKeenan, W. L. (2009). Novel phosphotyrosine targets of FGFR2IIIb signaling. *Cell. Signal.* **21**, 1370-1378.
- Machado, C., Sunkel, C. E. and Andrew, D. J. (1998). Human autoantibodies reveal titin as a chromosomal protein. *J. Cell Biol.* **141**, 321-333.
- Malhas, A. N., Lee, C. F. and Vaux, D. J. (2009). Lamin B1 controls oxidative stress responses via Oct-1. *J. Cell Biol.* **184**, 45-55.
- Malhas, A. N., Saunders, N. J. and Vaux, D. J. (2010). The nuclear envelope can control gene expression and cell cycle progression via miRNA regulation. *Cell Cycle* **9**, 531-539.
- Mamada, H., Takahashi, N. and Taira, M. (2009). Involvement of an inner nuclear membrane protein, Nemp1, in *Xenopus* neural development through an interaction with the chromatin protein BAF. *Dev. Biol.* **327**, 497-507.
- Manilal, S., Nguyen, T. M., Sewry, C. A. and Morris, G. E. (1996). The Emery-Dreifuss muscular dystrophy protein, emerin, is a nuclear membrane protein. *Hum. Mol. Genet.* **5**, 801-808.
- Mansharamani, M. and Wilson, K. L. (2005). Direct binding of nuclear membrane protein MAN1 to emerin in vitro and two modes of binding to barrier-to-autointegration factor. *J. Biol. Chem.* **280**, 13863-13870.
- Margalit, A., Brachner, A., Gotzmann, J., Foisner, R. and Gruenbaum, Y. (2007a). Barrier-to-autointegration factor-a BAFfling little protein. *Trends Cell Biol.* **17**, 202-208.
- Margalit, A., Neufeld, E., Feinstein, N., Wilson, K. L., Podbilewicz, B. and Gruenbaum, Y. (2007b). Barrier-to-autointegration factor (BAF) is required for blocking premature cell fusion, vulva formation, germ cell development and survival, DTC migration and adult muscle integrity in *C. elegans*. *J. Cell Biol.* **178**, 661-673.
- Markiewicz, E., Tilgner, K., Barker, N., van de Wetering, M., Clevers, H., Dorobek, M., Hausmanowa-Petrusewicz, I., Ramaekers, F. C., Broers, J. L., Blankesteijn, W. M. et al. (2006). The inner nuclear membrane protein emerin regulates beta-catenin activity by restricting its accumulation in the nucleus. *EMBO J.* **25**, 3275-3285.
- Marmiroli, S., Bertacchini, J., Beretti, F., Cenni, V., Guida, M., De Pol, A., Maraldi, N. M. and Lattanzi, G. (2009). A-type lamins and signaling: the PI 3-kinase/Akt pathway moves forward. *J. Cell. Physiol.* **220**, 553-561.
- Martin, C., Chen, S., Maya-Mendoza, A., Lovric, J., Sims, P. F. and Jackson, D. A. (2009). Lamin B1 maintains the functional plasticity of nucleoli. *J. Cell Sci.* **122**, 1551-1562.
- Mehta, I. S., Amira, M., Harvey, A. J. and Bridger, J. M. (2010). Rapid chromosome territory relocation by nuclear motor activity in response to serum removal in primary human fibroblasts. *Genome Biol.* **11**, R5.
- Meister, P., Towbin, B. D., Pike, B. L., Ponti, A. and Gasser, S. M. (2010). The spatial dynamics of tissue-specific promoters during *C. elegans* development. *Genes Dev.* **24**, 767-782.
- Melcon, G., Kozlov, S., Cutler, D. A., Sullivan, T., Hernandez, L., Zhao, P., Mitchell, S., Nader, G., Bakay, M., Rottman, J. N. et al. (2006). Loss of emerin at the nuclear envelope disrupts the Rb1/E2F and MyoD pathways during muscle regeneration. *Hum. Mol. Genet.* **15**, 637-651.
- Meyerzon, M., Fridolfsson, H. N., Ly, N., McNally, F. J. and Starr, D. A. (2009). UNC-83 is a nuclear-specific cargo adaptor for kinesin-1-mediated nuclear migration. *Development* **136**, 2725-2733.
- Mislow, M. K. J., Holaska, J. M., Kim, M. S., Lee, K. K., Segura-Totten, M., Wilson, K. L. and McNally, E. M. (2002). Nesprin-1a self-associates and binds directly to emerin and lamin A in vitro. *FEBS Lett.* **525**, 135-140.
- Montes de Oca, R., Shoemaker, C. J., Gucek, M., Cole, R. N. and Wilson, K. L. (2009). Barrier-to-integration factor proteome reveals chromatin-regulatory partners. *PLoS One* **e7050**.
- Muchir, A., Pavlidis, P., Bonne, G., Hayashi, Y. K. and Worman, H. J. (2007). Activation of MAPK in hearts of EMD null mice: similarities between mouse models of X-linked and autosomal dominant Emery Dreifuss muscular dystrophy. *Hum. Mol. Genet.* **16**, 1884-1895.
- Muchir, A., Wu, W. and Worman, H. J. (2009). Reduced expression of A-type lamins and emerin activates extracellular signal-regulated kinase in cultured cells. *Biochim. Biophys. Acta* **1792**, 75-81.
- Naetar, N. and Foisner, R. (2009). Lamin complexes in the nuclear interior control progenitor cell proliferation and tissue homeostasis. *Cell Cycle* **8**, 1488-1493.
- Nagano, A., Koga, R., Ogawa, M., Kurano, Y., Kawada, J., Okada, R., Hayashi, Y. K., Tsukahara, T. and Arahata, K. (1996). Emerin deficiency at the nuclear membrane in patients with Emery-Dreifuss muscular dystrophy. *Nat. Genet.* **12**, 254-259.
- Naismith, T. V., Dalal, S. and Hanson, P. I. (2009). Interaction of torsinA with its major binding partners is impaired by the dystonia-associated DeltaGAG deletion. *J. Biol. Chem.* **284**, 27866-27874.
- Nichols, R. J., Wiebe, M. S. and Traktman, P. (2006). The vaccinia-related kinases phosphorylate the N-terminus of BAF, regulating its interaction with DNA and its retention in the nucleus. *Mol. Biol. Cell* **17**, 2451-2464.
- Nili, E., Cocjaru, G. S., Kalma, Y., Ginsberg, D., Copeland, N. G., Gilbert, D. J., Jenkins, N. A., Berger, R., Shklat, S., Amariglio, N. et al. (2001). Nuclear membrane protein, LAP2 $\beta$ , mediates transcriptional repression alone and together with its binding partner GCL (germ cell-less). *J. Cell Sci.* **114**, 3297-3307.
- Olins, A. L., Hoang, T. V., Zwerger, M., Herrmann, H., Zentgraf, H., Nogel, A. A., Karakesisoglou, I., Hodzic, D. and Olins, D. E. (2009). The LINC-less granulocyte nucleus. *Eur. J. Cell Biol.* **88**, 203-214.
- Padan, R., Nainudel-Epsztejn, S., Goitein, R., Fainsod, A. and Gruenbaum, Y. (1990). Isolation and characterization of the *Drosophila* nuclear envelope protein otefin cDNA. *J. Biol. Chem.* **265**, 7808-7813.
- Pan, D., Estévez-Salmerón, L. D., Stroschein, S. L., Zhu, X., He, J., Zhou, S. and Luo, K. (2005). The integral inner nuclear membrane protein MAN1 physically interacts with the R-Smad proteins to repress signaling by the transforming growth factor- $\beta$  superfamily of cytokines. *J. Biol. Chem.* **280**, 15992-16001.
- Paulin-Levasseur, M., Blake, D. L., Julien, M. and Rouleau, L. (1996). The MAN antigens are non-lamin constituents of the nuclear lamina in vertebrate cells. *Chromosoma* **104**, 367-379.
- Penkner, A., Tang, L., Novatchkova, M., Ladurner, M., Fridkin, A., Gruenbaum, Y., Schweizer, D., Loidl, J. and Jantsch, V. (2007). The nuclear envelope protein

- matefin/SUN-1 is required for homologous pairing in *C. elegans* meiosis. *Dev. Cell* **12**, 873-885.
- Penkner, A. M., Fridkin, A., Gloggnitzer, J., Baudrimont, A., Machacek, T., Woglar, A., Csaszar, E., Pasierbek, P., Ammerer, G., Gruenbaum, Y. et al. (2009). Meiotic chromosome homology search involves modifications of the nuclear envelope protein matefin/SUN-1. *Cell* **139**, 920-933.
- Randles, K. N., Lam, J. T., Sewry, C. A., Puckelwartz, M., Furling, D., Wehnert, M., McNally, E. M. and Morris, G. E. (2010). Nesprins, but not Sun proteins, switch isoforms at the nuclear envelope during muscle development. *Dev. Dyn.* **239**, 998-1009.
- Roberts, R. C., Sutherland-Smith, A. J., Wheeler, M. A., Jensen, O. N., Emerson, L. J., Spiliotis, I. L., Tate, C. G., Kendrick-Jones, J. and Ellis, J. A. (2006). The Emery-Dreifuss muscular dystrophy associated-protein emerin is phosphorylated on serine 49 by protein kinase A. *FEBS J.* **273**, 4562-4575.
- Roux, K. J., Crisp, M. L., Liu, Q., Kim, D., Kozlov, S., Stewart, C. L. and Burke, B. (2009). Nesprin 4 is an outer nuclear membrane protein that can induce kinesin-mediated cell polarization. *Proc. Natl. Acad. Sci. USA* **106**, 2194-2199.
- Sato, A., Isaac, B., Phillips, C. M., Rillo, R., Carlton, P. M., Wynne, D. J., Kadad, R. A. and Dernberg, A. F. (2009). Cytoskeletal forces span the nuclear envelope to coordinate meiotic chromosome pairing and synapsis. *Cell* **139**, 907-919.
- Scaffidi, P. and Misteli, T. (2008). Lamin A-dependent misregulation of adult stem cells associated with accelerated ageing. *Nat. Cell Biol.* **10**, 452-459.
- Schirmer, E. C. and Gerace, L. (2005). The nuclear membrane proteome: extending the envelope. *Trends Biochem. Sci.* **30**, 551-558.
- Schirmer, E. C., Florens, L., Guan, T., Yates, J. R. and Gerace, L. (2003). Nuclear membrane proteins with potential disease links found by subtractive proteomics. *Science* **331**, 1380-1382.
- Schmitt, J., Benavente, R., Hodzic, D., Hoog, C., Stewart, C. L. and Alsheimer, M. (2007). Transmembrane protein Sun2 is involved in tethering mammalian meiotic telomeres to the nuclear envelope. *Proc. Natl. Acad. Sci. USA* **104**, 7426-7431.
- Shimi, T., Pflieger, K., Kojima, S., Pack, C. G., Solovei, I., Goldman, A. E., Adam, S. A., Shumaker, D. K., Kinjo, M., Cremer, T. et al. (2008). The A- and B-type nuclear lamin networks: microdomains involved in chromatin organization and transcription. *Genes Dev.* **22**, 3409-3421.
- Shumaker, D. K., Solimando, L., Sengupta, K., Shimi, T., Adam, S. A., Grunwald, A., Strelkov, S. V., Aebi, U., Cardoso, M. C. and Goldman, R. D. (2008). The highly conserved nuclear lamin Ig-fold binds to PCNA: its role in DNA replication. *J. Cell Biol.* **181**, 269-280.
- Spann, T. P., Goldman, A. E., Wang, C., Huang, S. and Goldman, R. D. (2002). Alteration of nuclear lamin organization inhibits RNA polymerase II-dependent transcription. *J. Cell Biol.* **156**, 603-608.
- Starr, D. A. (2009). A nuclear-envelope bridge positions nuclei and moves chromosomes. *J. Cell Sci.* **122**, 577-586.
- Stiegler, A. L., Burden, S. J. and Hubbard, S. R. (2009). Crystal structure of the frizzled-like cysteine-rich domain of the receptor tyrosine kinase MusK. *J. Mol. Biol.* **393**, 1-9.
- Tift, K. E., Bradbury, K. A. and Wilson, K. L. (2009). Tyrosine phosphorylation of nuclear-membrane protein emerin by Src, Abl and other kinases. *J. Cell Sci.* **122**, 3780-3790.
- Tilgner, K., Wojciechowicz, K., Jahoda, C., Hutchison, C. and Markiewicz, E. (2009). Dynamic complexes of A-type lamins and emerin influence adipogenic capacity of the cell via nucleocytoplasmic distribution of beta-catenin. *J. Cell Sci.* **122**, 401-413.
- Tzur, Y., Wilson, K. L. and Gruenbaum, Y. (2006). SUN-domain proteins: 'Velcro' that links the nucleus to the cytoskeleton. *Nat. Rev. Cell Mol. Biol.* **7**, 782-788.
- Vander Heyden, A. B., Naismith, T. V., Snapp, E. L., Hodzic, D. and Hanson, P. I. (2009). LULL1 retargets TorsinA to the nuclear envelope revealing an activity that is impaired by the DYT1 dystonia mutation. *Mol. Biol. Cell* **20**, 2661-2672.
- Wagner, N. and Krohne, G. (2007). LEM-Domain proteins: new insights into lamin-interacting proteins. *Int. Rev. Cytol.* **261**, 1-46.
- Wang, X., Xu, S., Rivolta, C., Li, L. Y., Peng, G. H., Swain, P. K., Sung, C. H., Swaroop, A., Berson, E. L., Dryja, T. P. et al. (2002). Barrier to autointegration factor interacts with the cone-rod homeobox and represses its transactivation function. *J. Biol. Chem.* **277**, 43288-43300.
- Warren, D. T., Zhang, Q., Weissberg, P. L. and Shanahan, C. M. (2005). Nesprins: intracellular scaffolds that maintain cell architecture and coordinate cell function? *Exp. Rev. Mol. Med.* **7**, 1-15.
- Wen, B., Wu, H., Shinkai, Y., Irizarry, R. A. and Feinberg, A. P. (2009). Large histone H3 lysine 9 dimethylated chromatin blocks distinguish differentiated from embryonic stem cells. *Nat. Genet.* **41**, 246-250.
- Wilhelmsen, K., Litjens, S. H., Kuikman, I., Tshimbalanga, N., Janssen, H., van den Bout, I., Raymond, K. and Sonnenberg, A. (2005). Nesprin-3, a novel outer nuclear membrane protein, associates with the cytoskeletal linker protein plectin. *J. Cell Biol.* **171**, 799-810.
- Wilson, K. L. and Foisner, R. (2010). Lamin-binding proteins. *CSH Perspectives*. Epub.
- Worman, H. J. and Bonne, G. (2007). "Laminopathies": a wide spectrum of human diseases. *Exp. Cell Res.* **313**, 2121-2133.
- Worman, H. J., Yuan, J., Blobel, G. and Georgatos, S. D. (1988). A lamin B receptor in the nuclear envelope. *Proc. Natl. Acad. Sci. USA* **85**, 8531-8534.
- Ye, Q., Callebaut, L., Pezhman, A., Courvalin, J. C. and Worman, H. J. (1997). Domain-specific interactions of human HP1-type chromodomain proteins and inner nuclear membrane protein LBR. *J. Biol. Chem.* **272**, 14983-14989.
- Young, K. G. and Kothary, R. (2005). Spectrin repeat proteins in the nucleus. *BioEssays* **27**, 144-152.
- Young, K. G. and Kothary, R. (2008). Dystonin/Bpag1 is a necessary endoplasmic reticulum/nuclear envelope protein in sensory neurons. *Exp. Cell Res.* **314**, 2750-2761.
- Zastrow, M. S., Vlcek, S. and Wilson, K. L. (2004). Proteins that bind A-type lamins: integrating isolated clues. *J. Cell Sci.* **117**, 979-987.
- Zastrow, M. S., Flaherty, D. B., Benian, G. M. and Wilson, K. L. (2006). Nuclear Titin interacts with A- and B-type lamins in vitro and in vivo. *J. Cell Sci.* **119**, 239-249.
- Zhang, Q., Ragnauth, C. D., Skepper, J. N., Worth, N. F., Warren, D. T., Roberts, R. G., Weissberg, P. L., Ellis, J. A. and Shanahan, C. M. (2005). Nesprin-2 is a multi-isomeric protein that binds lamin and emerin at the nuclear envelope and forms a subcellular network in skeletal muscle. *J. Cell Sci.* **118**, 673-687.

**Cell Science at a Glance on the Web**  
Electronic copies of the poster insert are available in the online version of this article at [jcs.biologists.org](http://jcs.biologists.org). The JPEG images can be downloaded for printing or used as slides.
